# Supplementary material for: Divergence in Corn Mycorrhizal Colonization Patterns Due to Organic Treatment
Source: MDPI journal article supplement (doi:10.3390/plants10122760), 2021-12-14
Supplement: s1 [file s1]

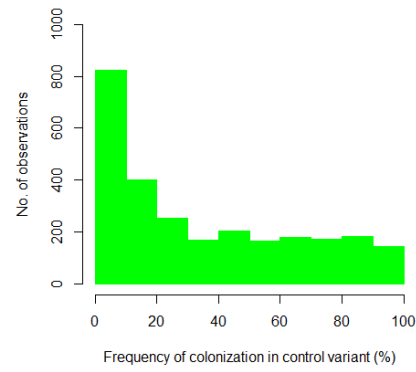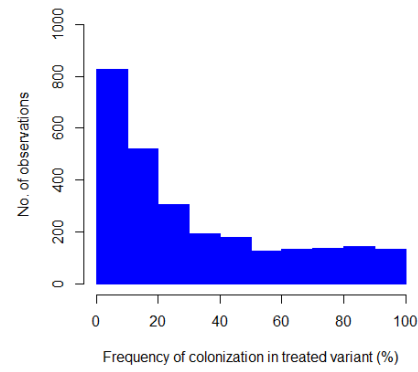

a-b) Frequency

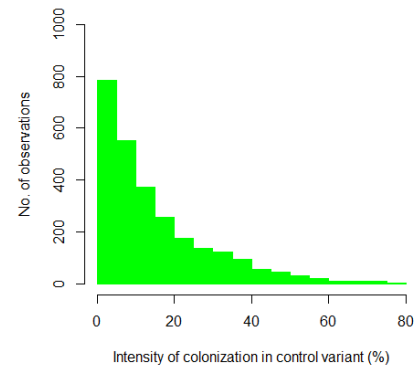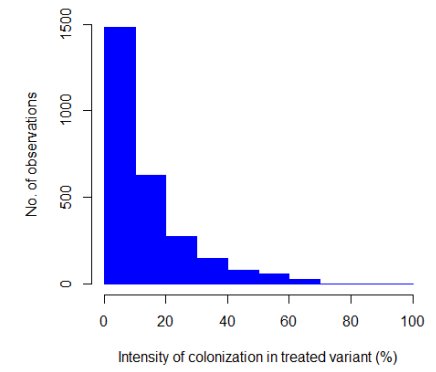

c-d) Intensity

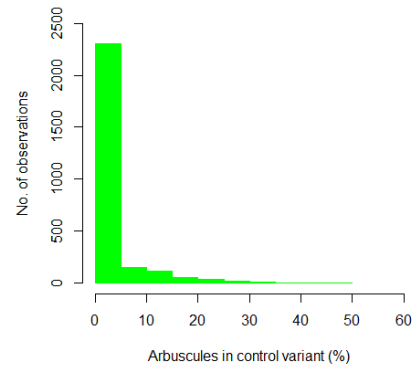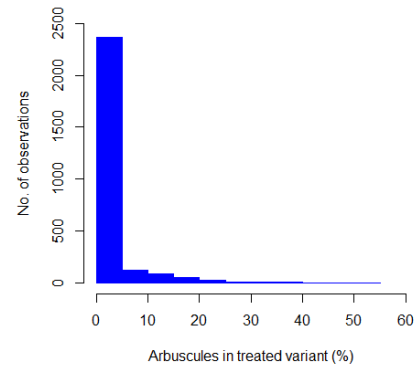

e-f) Arbuscules

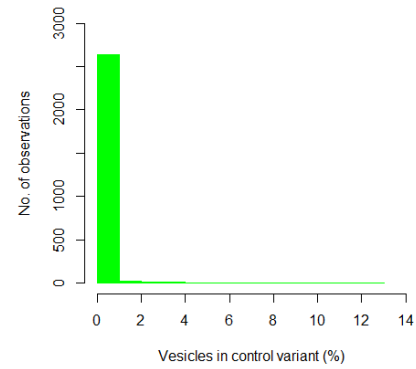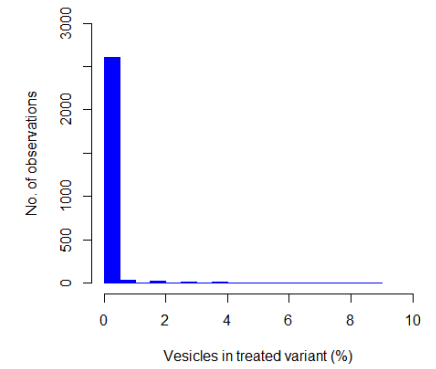

g-h) Vesicles

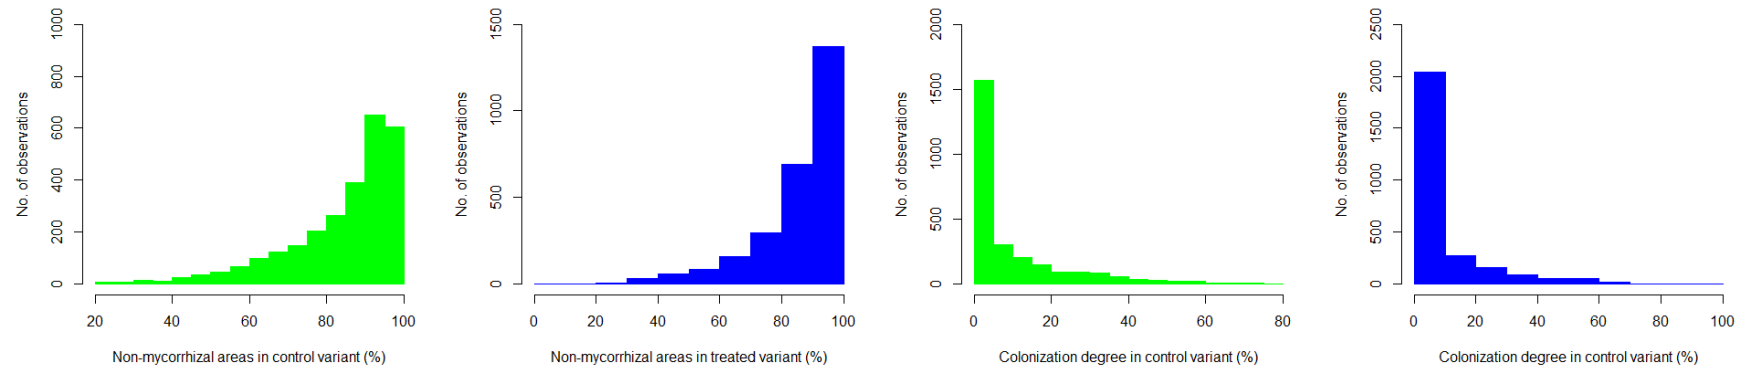

i-j) Non-mycorrhizal areas

k-l) Colonization degree

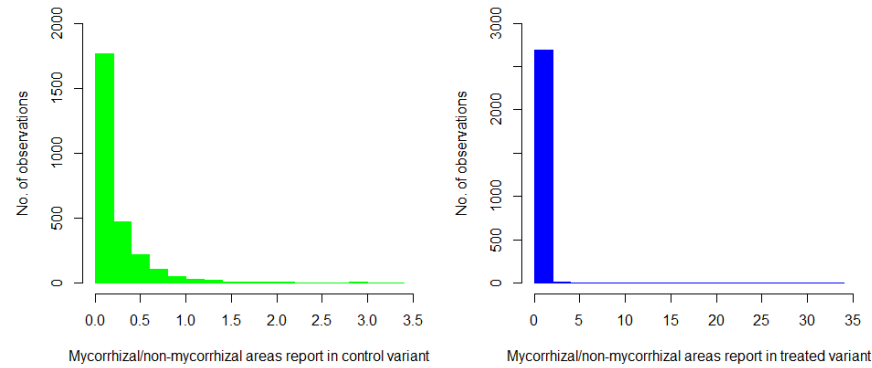

m-n) Mycorrhizal / non-mycorrhizal report

**Figure S1.** Histograms of data distribution and normality in colonization parameters - Control vs. Treated variant (Color code: Control – green, Treatment – blue): a–b) Frequency (%); c–d) Intensity (%); e–f) Arbuscules (%); g–h) Vesicles (%); i–j) Non-mycorrhizal areas (%); k–l) Colonization degree (%); m–n) Mycorrhizal / non-mycorrhizal report.
